# Supplementary material for: FEP Encapsulated Crack-Based Sensor for Measurement in Moisture-Laden Environment
Source: MDPI journal article supplement (doi:10.3390/ma12091516), 2019-05-09
Supplement: s1 [file s1]

# FEP Encapsulated Crack-Based Sensor for Measurement in Moisture-Laden Environment

Minho Kim <sup>1,†</sup>, Hyesu Choi <sup>1,†</sup>, Taewi Kim <sup>1</sup>, Insic Hong <sup>1</sup>, Yeonwook Roh <sup>1</sup>, Jieun Park <sup>1</sup>, SungChul Seo <sup>2</sup>, Seungyong Han <sup>1,\*</sup>, Je-sung Koh <sup>1,\*</sup> and Daeshik Kang <sup>1,\*</sup>

<sup>1</sup> Department of Mechanical Engineering, Ajou University, Suwon 16499, Korea; hgh7706@ajou.ac.kr (M.K.); michelle0407@ajou.ac.kr (H.C.); rsb5287@gmail.com (T.K.); his3080@gmail.com (I.H.); ckj2065@naver.com (Y.R.); n9near@ajou.ac.kr (J.P.)

<sup>2</sup> Department of Health, Environmental and safety, Eulji University, Seongnam 13135, Korea; seo@eulji.ac.kr

<sup>†</sup> These authors contributed equally to this work

\* Correspondence: sy84han@ajou.ac.kr (S.H.); jskoh@ajou.ac.kr (J.K.); dskang@ajou.ac.kr (D.K.)

**Keywords:** strain sensor; thin metal film; spider inspired; crack; encapsulation

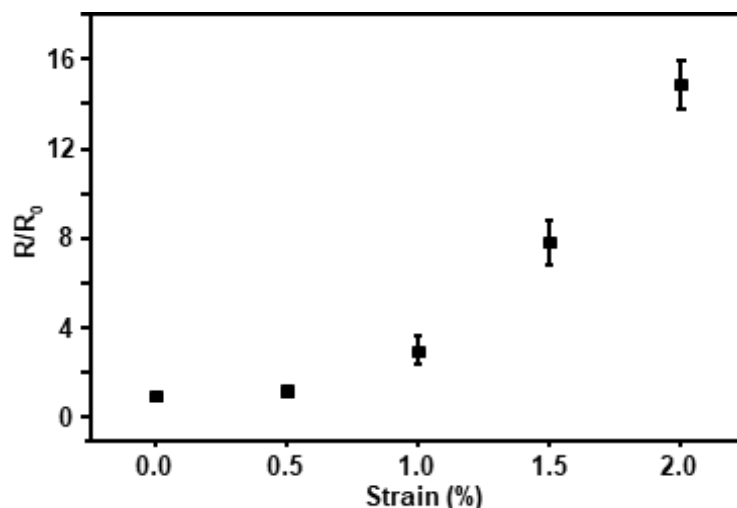

Figure S1. Reproducibility of the FEP encapsulated sensor.

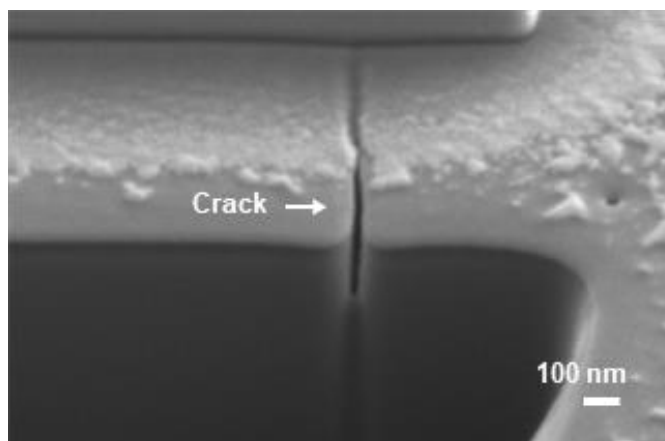

Figure S2. FIB Image of a crack on the sensor's surface.

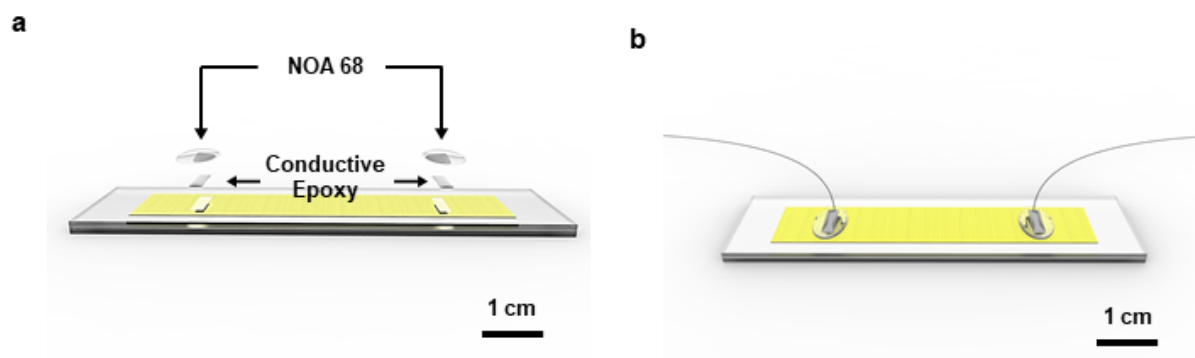

**Figure S3.** (a) Schematic illustration of wire-connecting method. (b) Schematic illustration of wire-connected FEP encapsulated sensor.

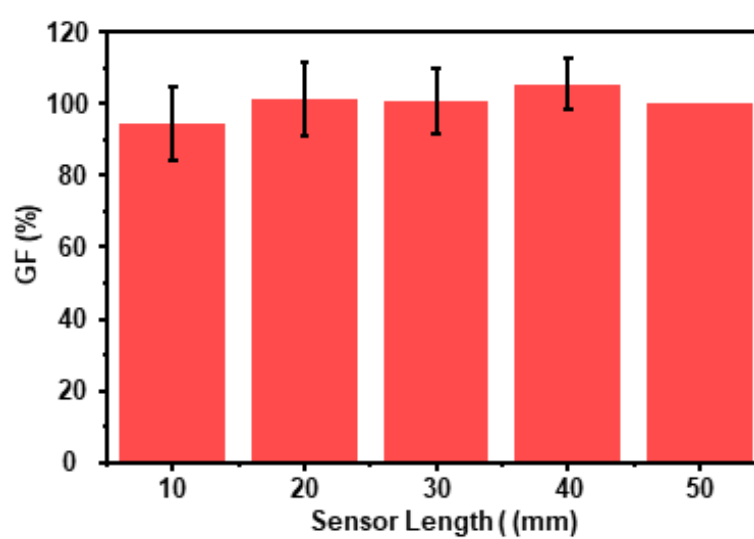

**Figure S4.** Gauge Factor variation of sensors with different length. (Percentage calculated from a sample with 50 mm length).

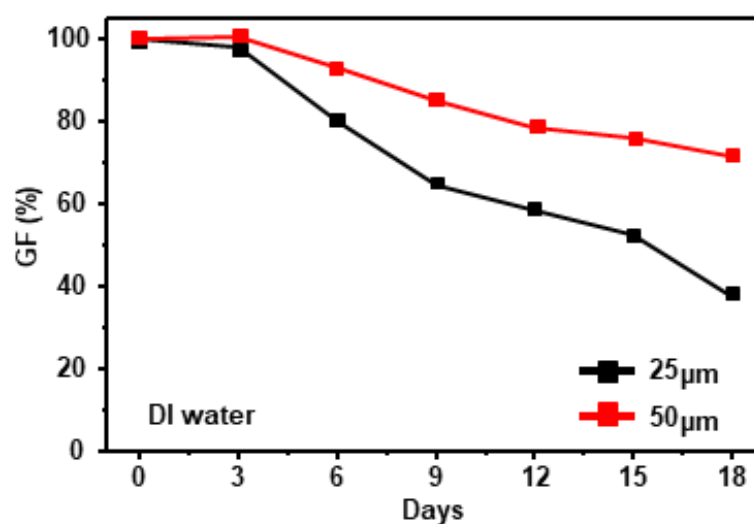

**Figure S5.** Gauge Factor variation of sensors encapsulated by 25 μm FEP films and 50 μm FEP films that have been in water for 18 days.

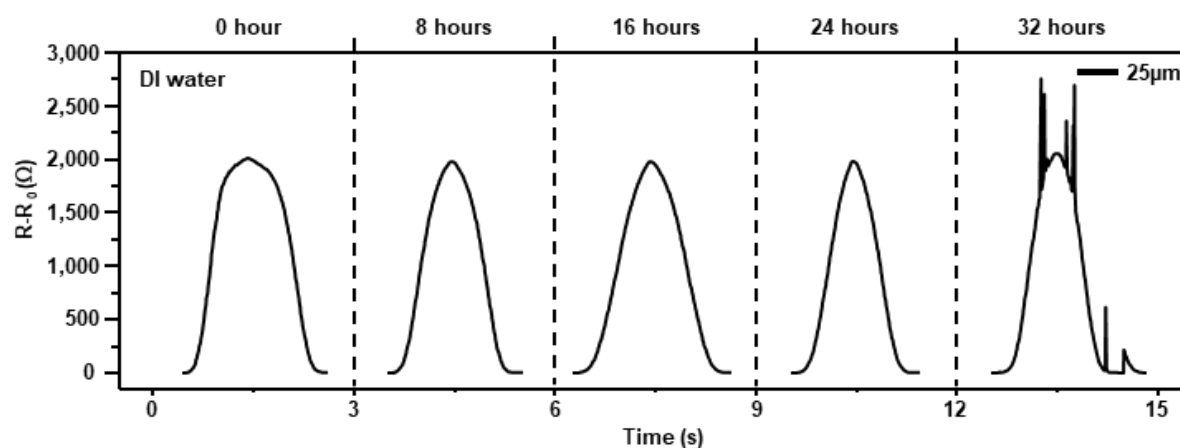

**Figure S6.** Resistance variation of bare crack sensor that have been in water for 32 h.

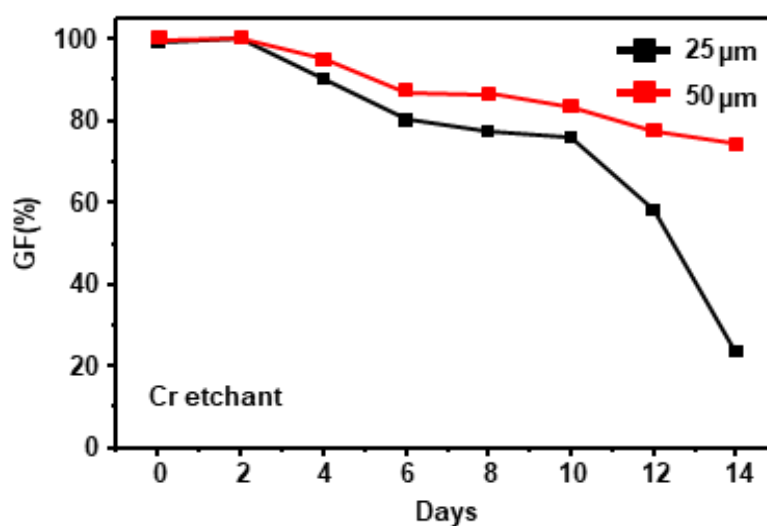

**Figure S7.** Gauge Factor variation of sensors encapsulated by 25  $\mu\text{m}$  FEP films and 50  $\mu\text{m}$  FEP films that have been in chromium etchant for 14 days.

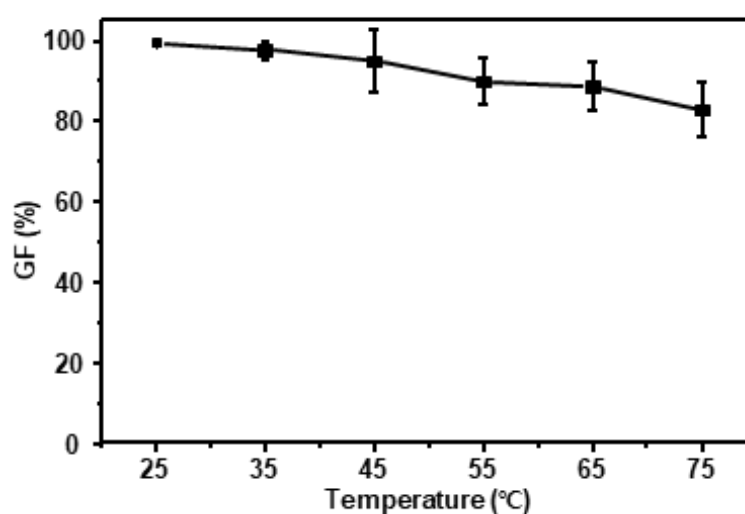

**Figure 8.** Gauge Factor variation of the sensor encapsulated by 25  $\mu\text{m}$  FEP films from 25  $^{\circ}\text{C}$  to 75  $^{\circ}\text{C}$ .

**Table S1.** Sample size, Mean and Standard deviation of the resistance variation data from finger motion test in Figure 4c.

|       | Sample size | Mean     | Standard Deviation |
|-------|-------------|----------|--------------------|
| air   | 10          | 0.166465 | 0.006656           |
| water | 10          | 0.147988 | 0.006264           |

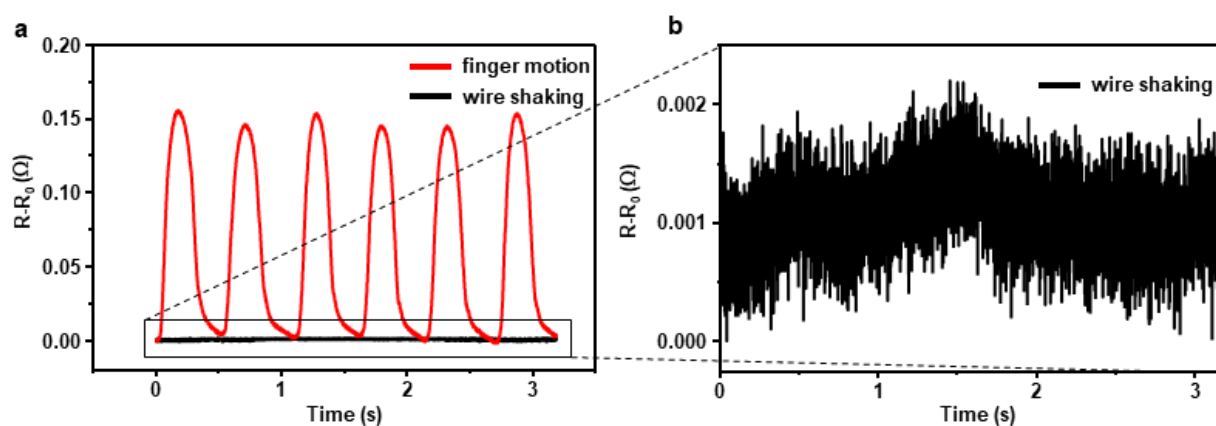

**Figure S9.** (a) Resistance variation of the sensor encapsulated with the 25 μm FEP film during the finger motion test. (b) Shows a small-scale plot for the wire shaking.

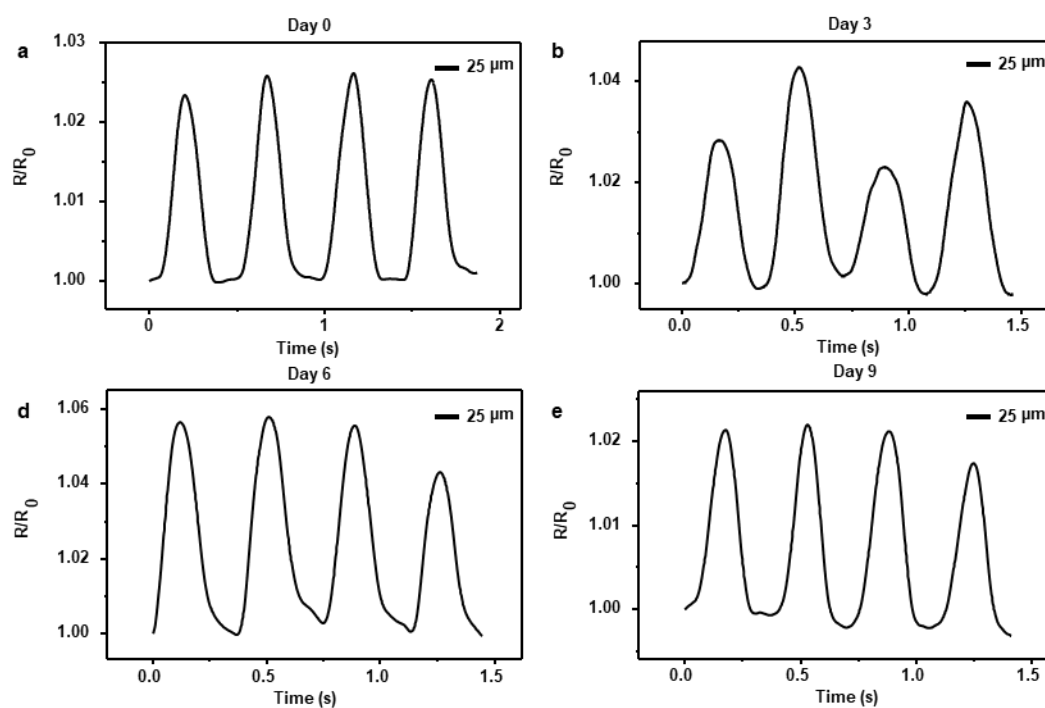

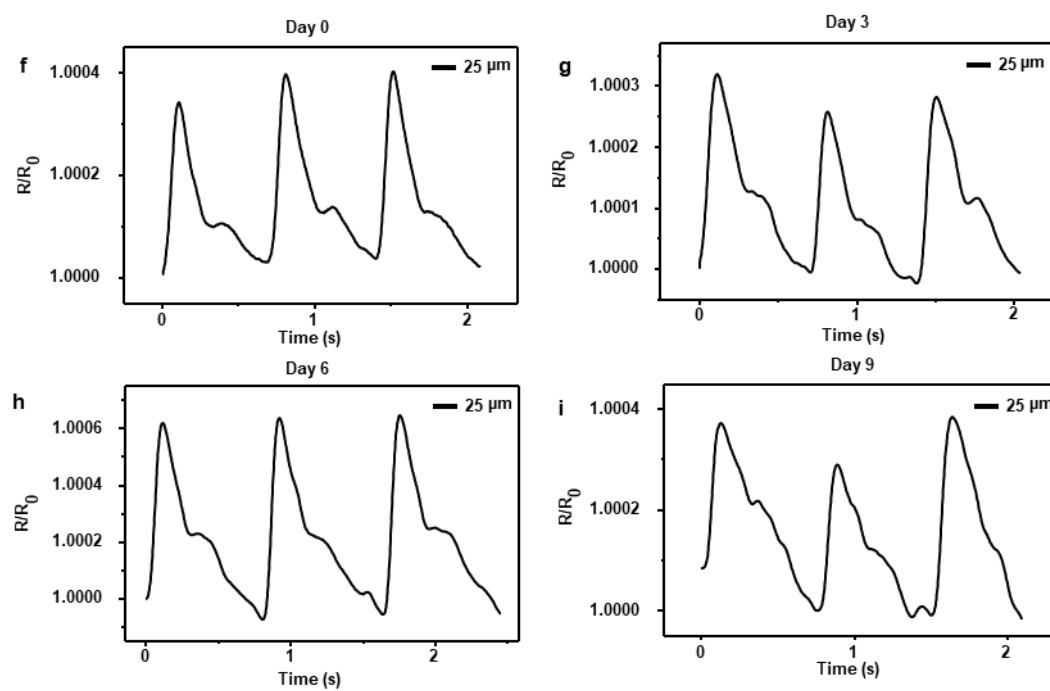

**Figure S10.** (a), (b), (c), (d) Measurement of finger's motions using the sensor encapsulated with the 25  $\mu\text{m}$  FEP film that have been soaked in water for 9 days. (f), (g), (h), (i) Measurement of pulse rate using the sensor encapsulated with the 25  $\mu\text{m}$  FEP film that have been soaked in water for 9 days.
